# Supplementary material for: A bio-inspired colorimetric sensor based on ethylene glycol – non-close-packed photonic crystals for visual monitoring of ammonia
Source: Royal Society of Chemistry journal article supplement (doi:10.1039/d3tc04148d), 2024-01-01
Supplement: d3tc04148d2.pdf [file d3tc04148d2.pdf]

## The Supporting Information for

### Bio-inspired Colorimetric Sensor Based on Ethylene Glycol – Non-close-packed photonic crystals for visual monitoring of Ammonia

Wenxiang Zheng <sup>a</sup>, Niu Zhang <sup>b</sup>, Ghulam Murtaza <sup>a</sup>, Lei Wu <sup>a\*</sup>, Zihui Meng <sup>a</sup> and Lili Qiu <sup>a\*</sup>

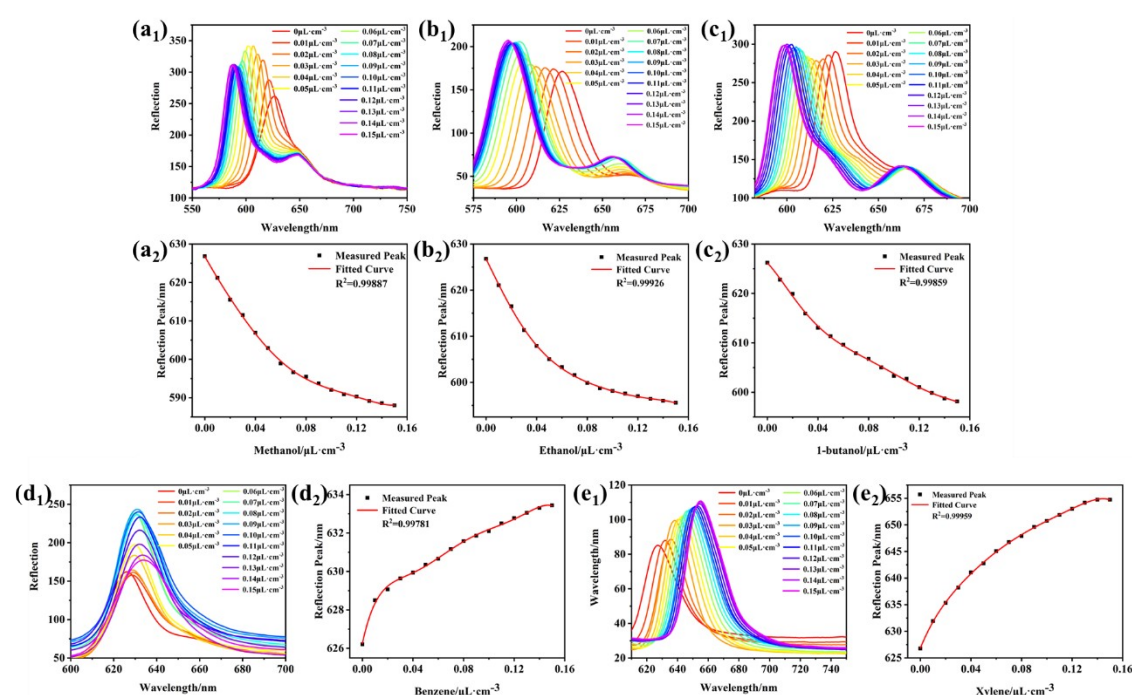

**Figure S1.** The responsive spectrum and reflective peak – concentration curve of the EG - NPCs with 50 mg·mL<sup>-1</sup>AM (a<sub>1</sub>, a<sub>2</sub>) methanol, (b<sub>1</sub>, b<sub>2</sub>) ethanol, (c<sub>1</sub>, c<sub>2</sub>) 1-butanol, (d<sub>1</sub>, d<sub>2</sub>) benzene, (e<sub>1</sub>, e<sub>2</sub>) xylene.
